# Supplementary material for: Chitosan/snail slime films as multifunctional platforms for potential biomedical and cosmetic applications: physical and chemical characterization
Source: Royal Society of Chemistry journal article supplement (doi:10.1039/d2tb02119f), 2022-12-19
Supplement: d2tb02119f1.pdf [file d2tb02119f1.pdf]

# Electronic Supporting Information

## **Chitosan/Snail slime films as multifunctional platforms for potential biomedical and cosmetic applications: physical, and chemical characterization**

Jennifer Gubitosa<sup>a</sup>, Vito Rizzi<sup>a\*</sup>, Paola Fini<sup>b</sup>, Fiorenza Fanelli<sup>c</sup>, Teresa Sibillano<sup>d</sup>, Nicola Corriero<sup>d</sup>,  
Pinalysa Cosma<sup>a\*</sup>

<sup>a</sup>Università degli Studi “Aldo Moro” di Bari, Dipartimento di Chimica, Via Orabona, 4- 70126 Bari, Italy;

<sup>b</sup>Consiglio Nazionale delle Ricerche CNR-IPCF, UOS Bari, Via Orabona, 4- 70126 Bari, Italy;

<sup>c</sup>Consiglio Nazionale delle Ricerche, Istituto di Nanotecnologia (CNR-NANOTEC) c/o Dipartimento di Chimica, Università degli Studi “Aldo Moro”, Via Orabona, 4 - 70126 Bari, Italy;

<sup>d</sup>Consiglio Nazionale delle Ricerche CNR-IC, UOS Bari, Via Amendola,122/O 70126 Bari, Italy;

\*Corresponding Authors: Prof. Pinalysa Cosma:

Università degli studi di Bari “Aldo Moro”

Dipartimento di Chimica, Via Orabona 4-70126 Bari, Italy

Tel: +390805443443

E-mail [pinalysa.cosma@uniba.it](mailto:pinalysa.cosma@uniba.it)

\*Dr. Vito Rizzi:

Università degli studi di Bari “Aldo Moro”

Dipartimento di Chimica, Via Orabona 4-70126 Bari, Italy

Tel: +390805443443

### 1. Profilometer analyses.

White light vertical scanning interferometry (WLVSI) was used to determine the topography of the chitosan-based films and estimate their root mean square (RMS) surface roughness. Analyses were carried out using a Bruker Contour GT-K0X 3D optical microscope equipped with a 50x Mirau-type interferometric objective and a 0.55x camera zoom ( $0.23 \times 0.17 \text{ mm}^2$  field of view). The RMS roughness values are the mean of 30 measurements carried out over  $0.17 \times 0.23 \text{ mm}^2$  surface areas.

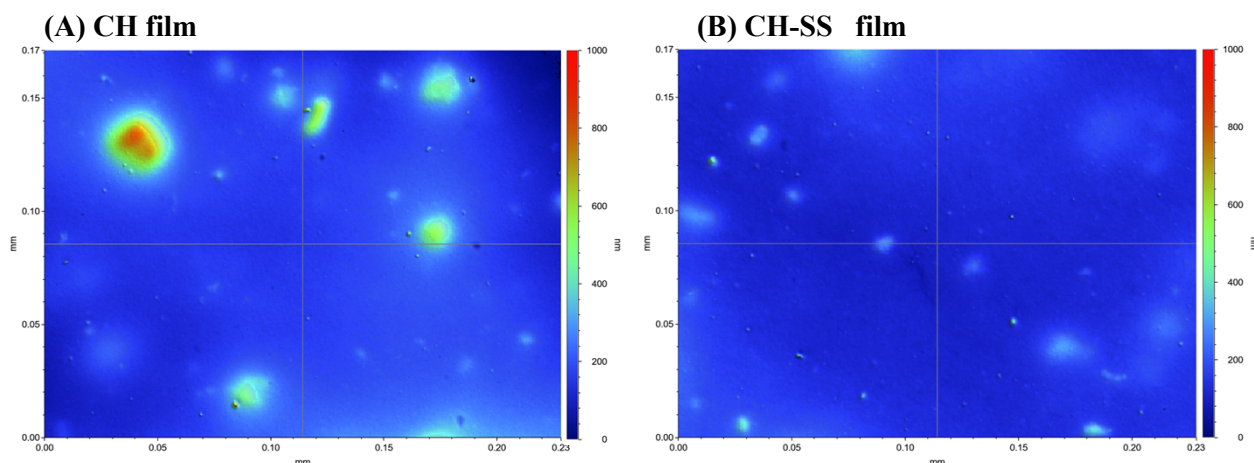

**Figure S1.** 2D white light vertical scanning interferometry (WLVSI) images of the CH (A) and CH-SS (B) films, containing 0% and 8% (v/v) of SS, respectively.

### 2. X-ray diffraction (XRD) analyses.

X-ray diffraction (XRD) data were collected at room temperature from a sample of Chitosan/Snail slime films by using a Bruker D8 Discover diffractometer (operating conditions 40 kV, 40 mA) equipped with a Goebel mirror for copper radiation ( $\lambda_{K\alpha 1} = 1.54056 \text{ \AA}$ ,  $\lambda_{K\alpha 2} = 1.54439 \text{ \AA}$ ), and a scintillator detector. Data were collected in a reflection geometry at a fixed incidence angle of  $\omega = 1^\circ$  while moving the detector between  $10^\circ$  and  $70^\circ$  with a step size of  $0.05^\circ$ .

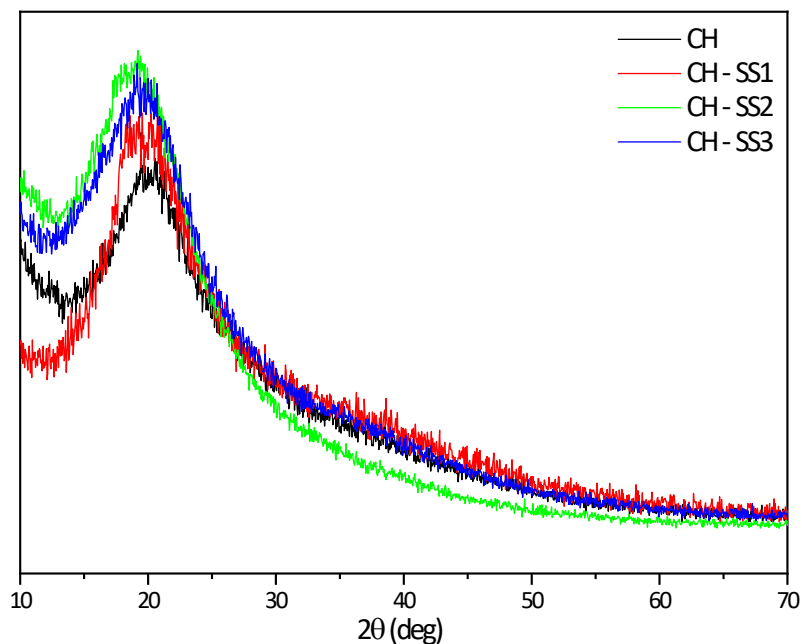

**Figure S2:** XRD diffraction patterns of CH, CH-SS1, CH-SS2, and CH-SS3 films, containing 0%, 4%, 8%, and 12 % (v/v) of SS, respectively.

### 3. Water Contact Angle (WCA) analyses.

Experimentally, in the present study, the wettability of the chitosan-based films was evaluated using a KSV CAM 200 optical contact angle meter by depositing on the samples 2  $\mu$ L distilled water droplets.

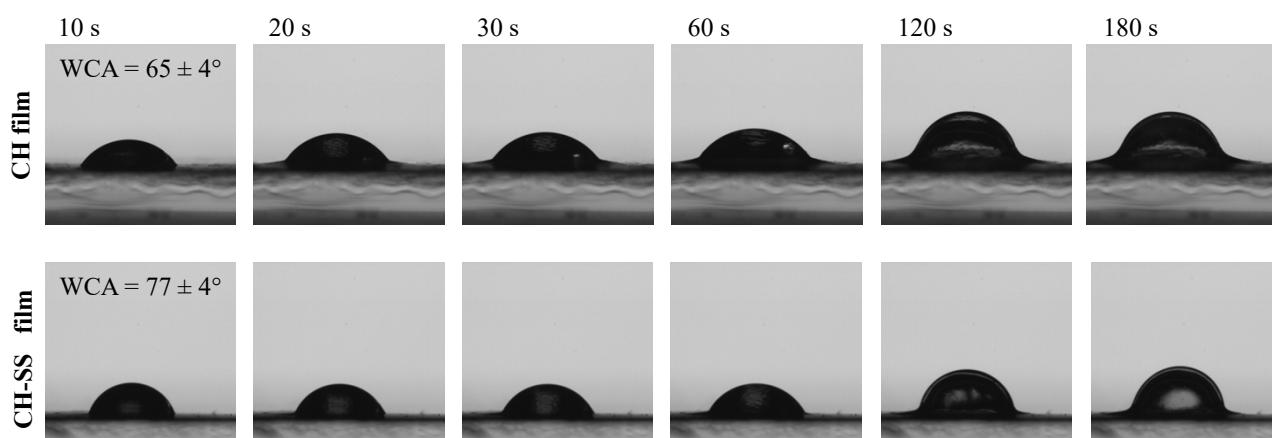

**Figure S3.** Time-lapse images acquired over time with an optical contact angle meter after depositing a 2  $\mu$ L distilled water droplet on the CH and CH-SS films, containing 0% and 8% of SS, respectively.

|          | 2 $\theta$ amorphous peak position<br>(deg) | FWHM<br>(Gaussian fit of the peak) |
|----------|---------------------------------------------|------------------------------------|
| CH       | 20.3                                        | 6.1                                |
| CH - SS1 | 20.3                                        | 4.3                                |
| CH - SS2 | 19.55                                       | 6.5                                |
| CH - SS3 | 19.80                                       | 8.7                                |

**Table S1:** The FWHM of the diffraction patterns by the Gaussian fit of the amorphous peaks, reported in Figure S2.
